# Supplementary material
Source: publisher figshare collection journal article supplement (https://tandf.figshare.com/ndownloader/files/23173064)
Supplement: Supplementary file 1 [file 23173064]

**Supporting Information:**

**Recyclable heterogeneous palladium-catalyzed carbonylative Sonogashira coupling under CO gas-free conditions**

Zebiao Zhou,a Jianying Li,b Zhaotao Xu,a and Mingzhong Caia*

a Key Laboratory of Functional Small Organic Molecule, Ministry of Education and Department of Chemistry, Jiangxi Normal University, Nanchang 330022, China

b School of Biology and Environmental Engineering, Jingdezhen University, Jingdezhen 333000, China

E-mail: caimzhong@163.com

**Characterization of the catalysts**


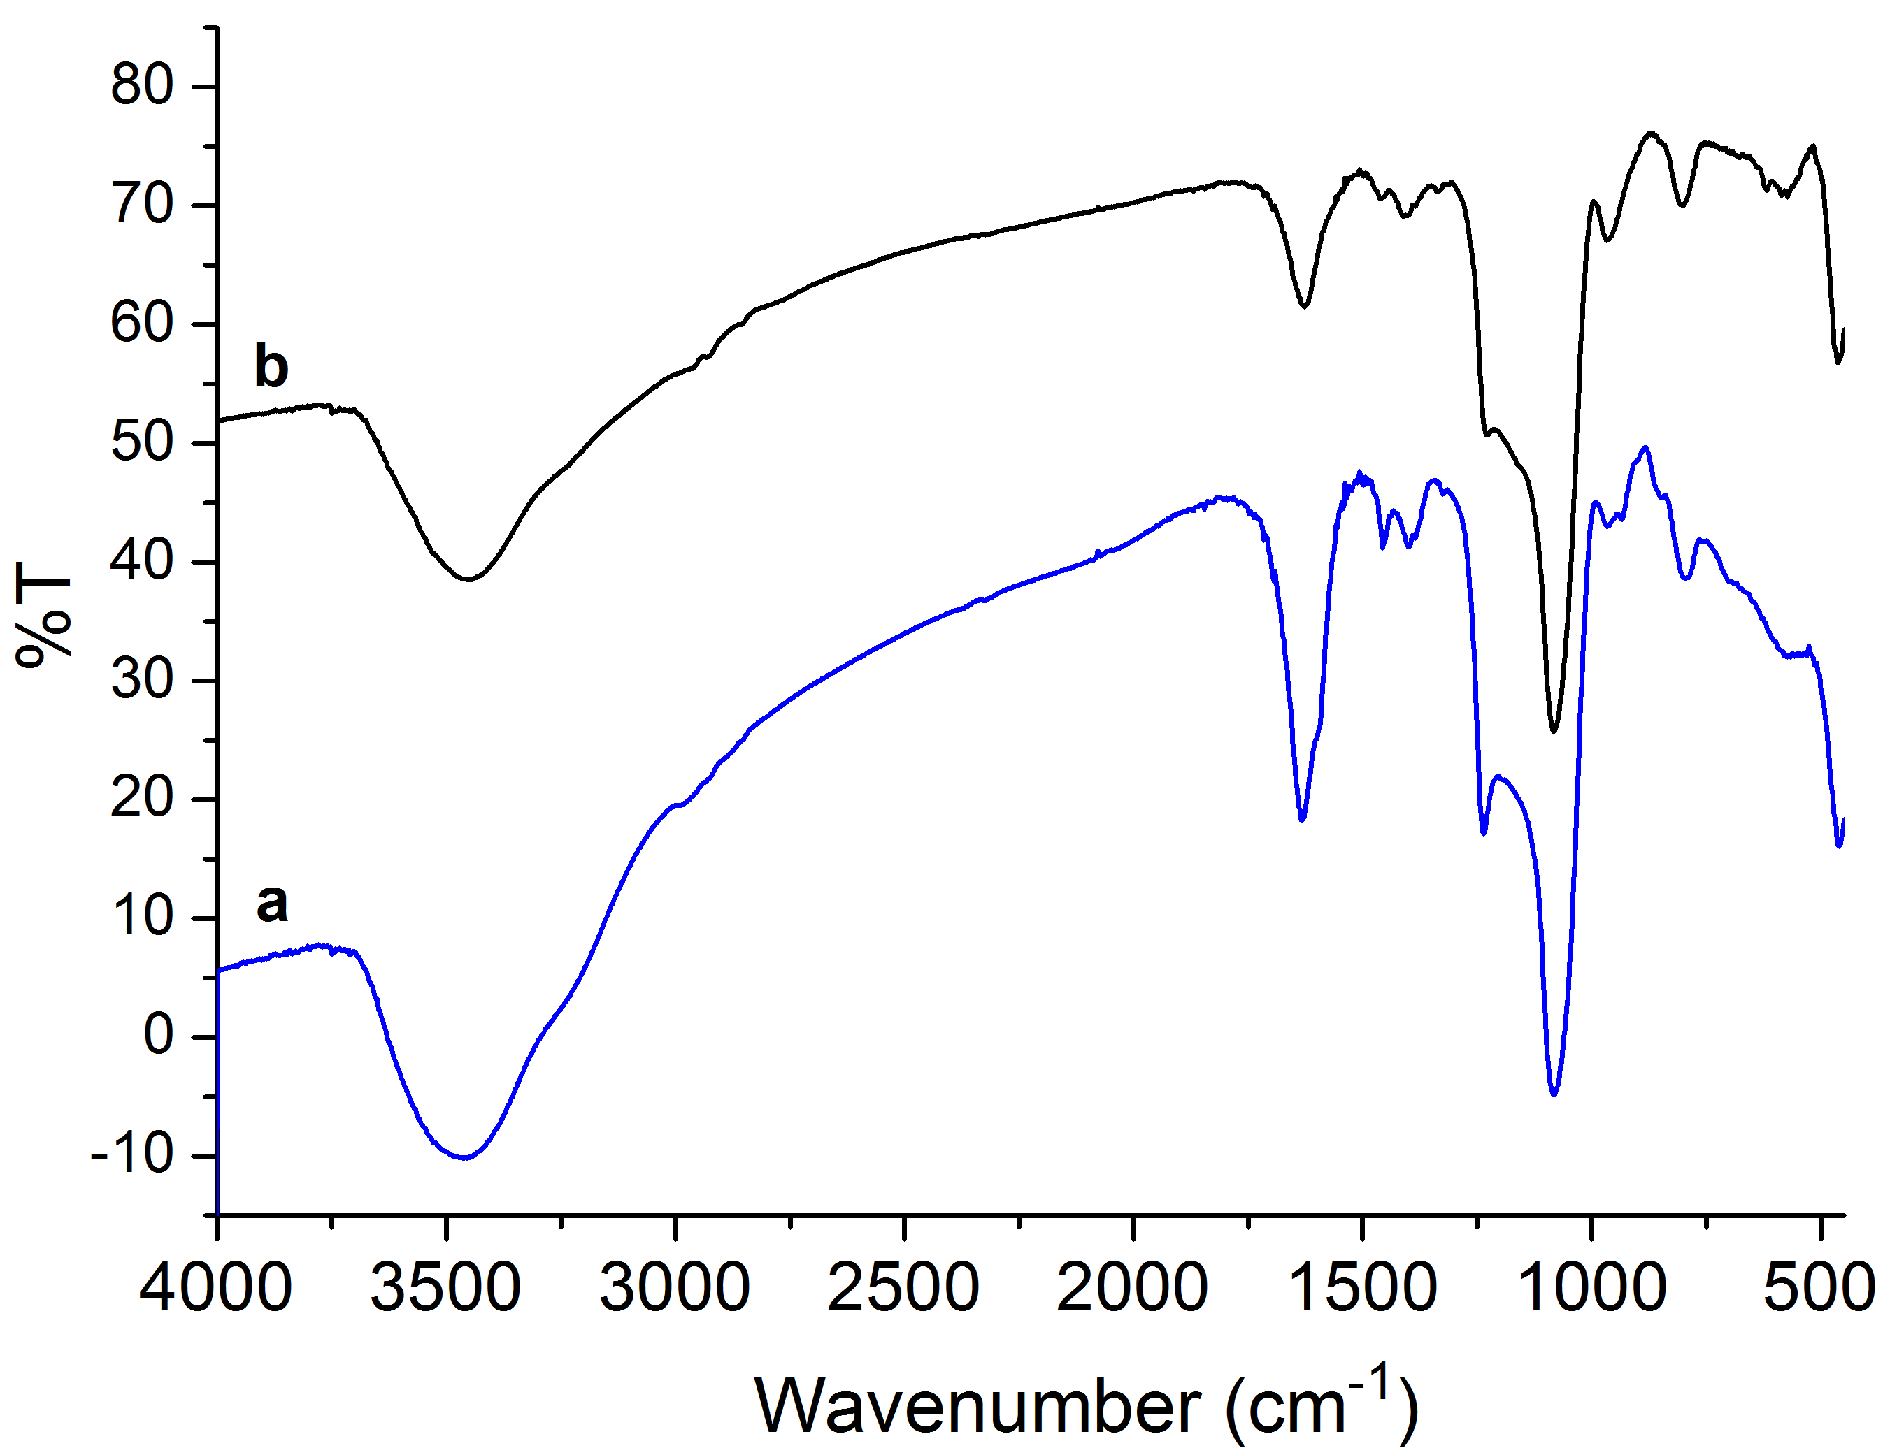


**SFig. 1.** FT-IR spectra of MCM-41-2P-Pd(OAc)2 (a) and the recovered MCM-41-2P- Pd(OAc)2 (b).


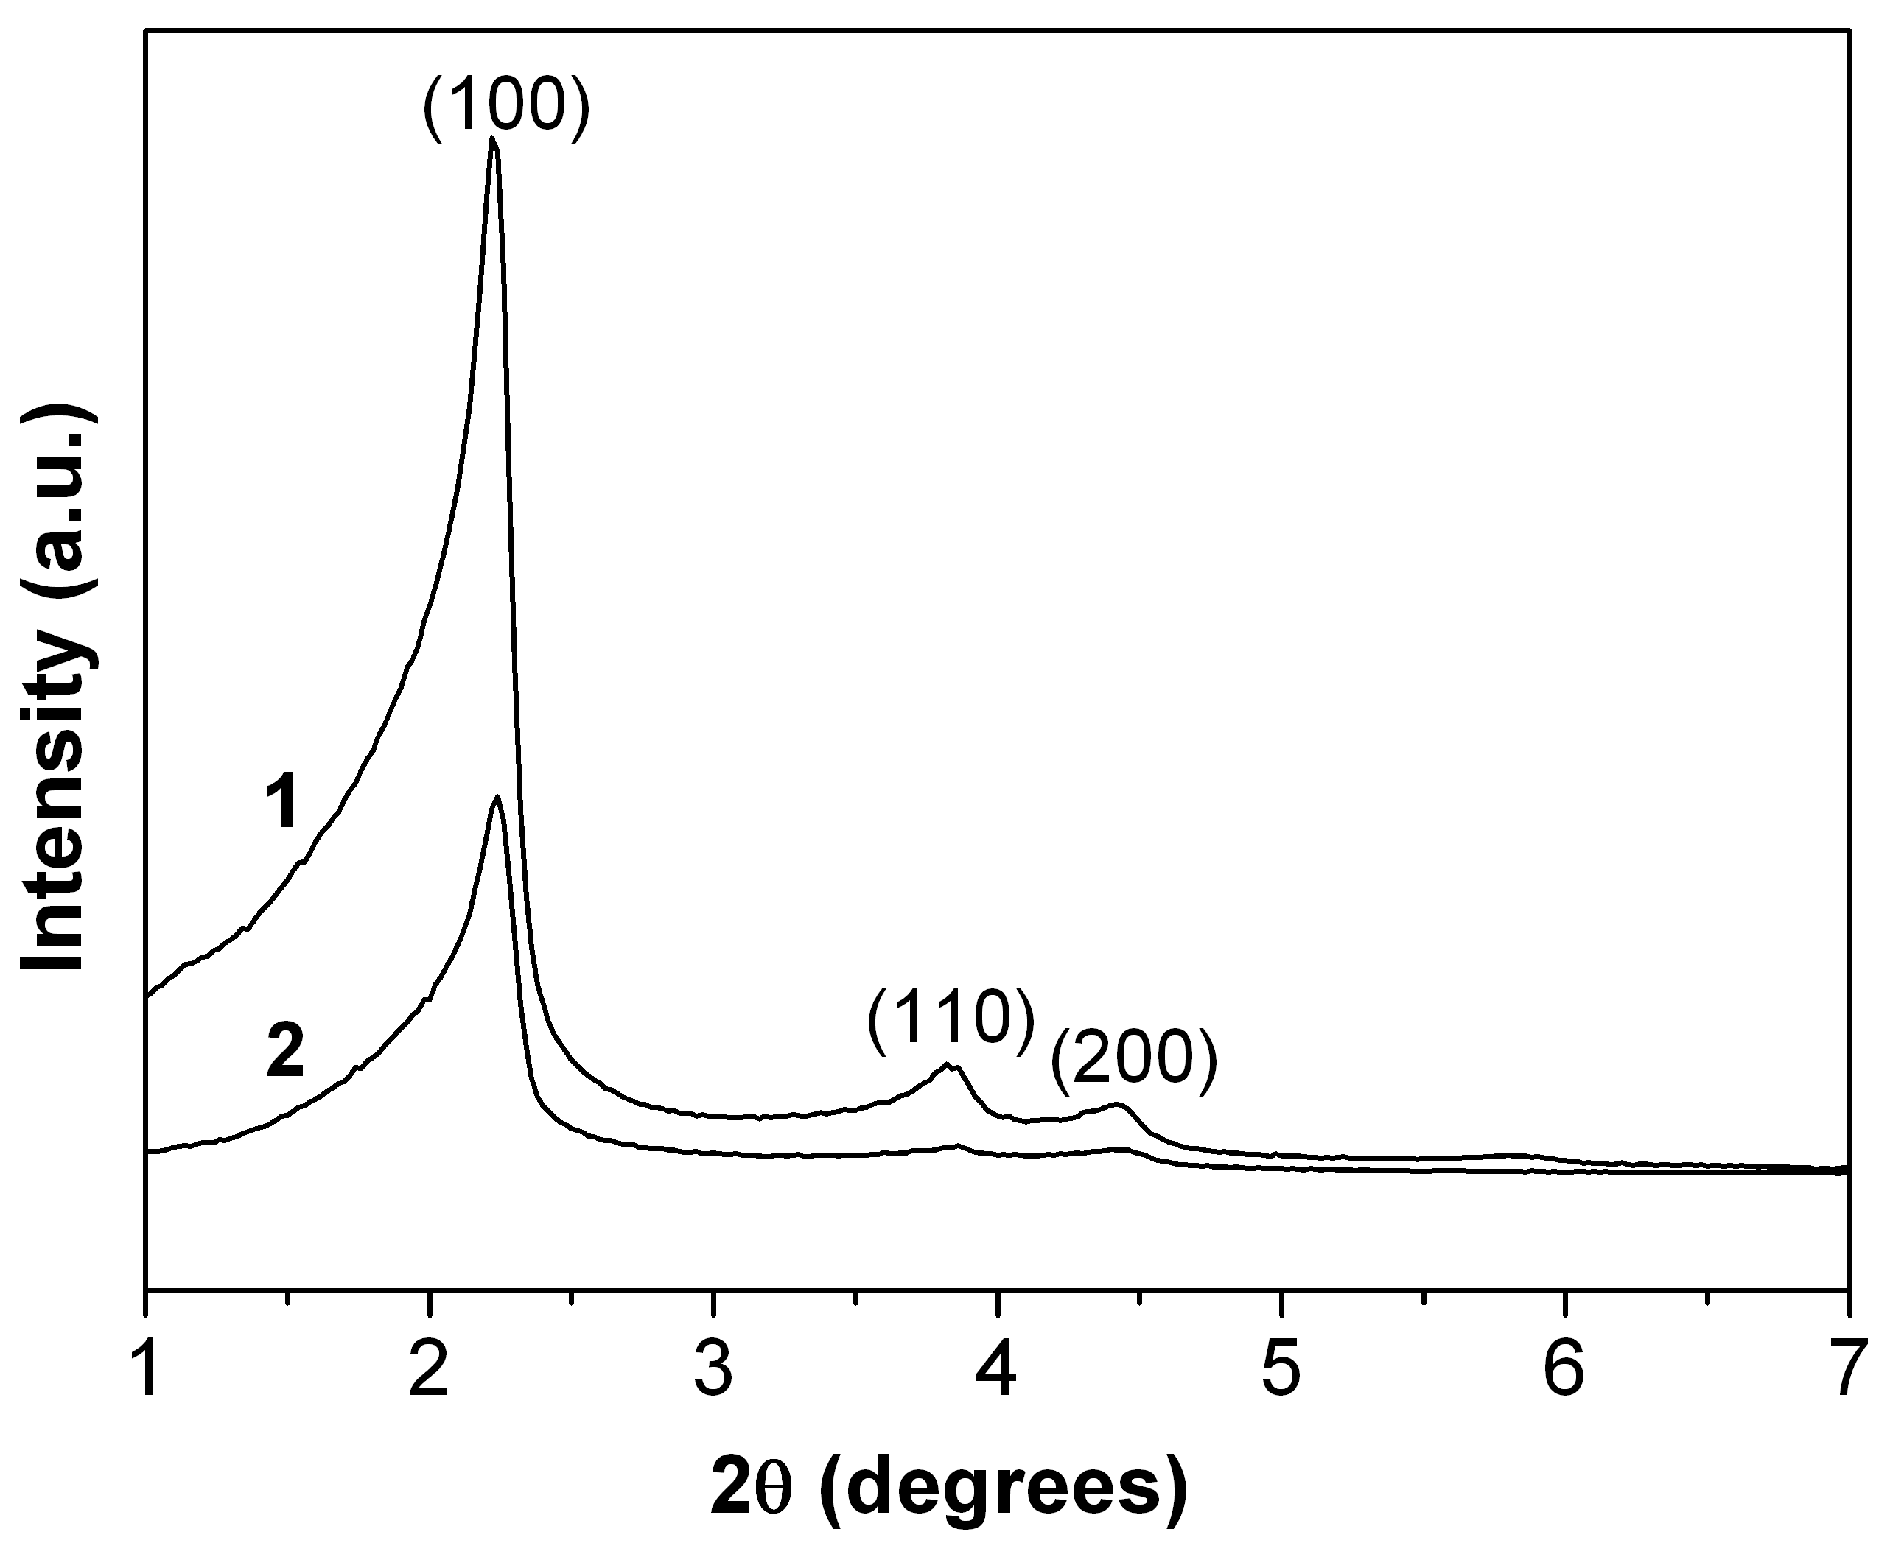


**SFig. 2.** XRD of MCM-41 (1) and MCM-41-2P-Pd(OAc)2 (2).


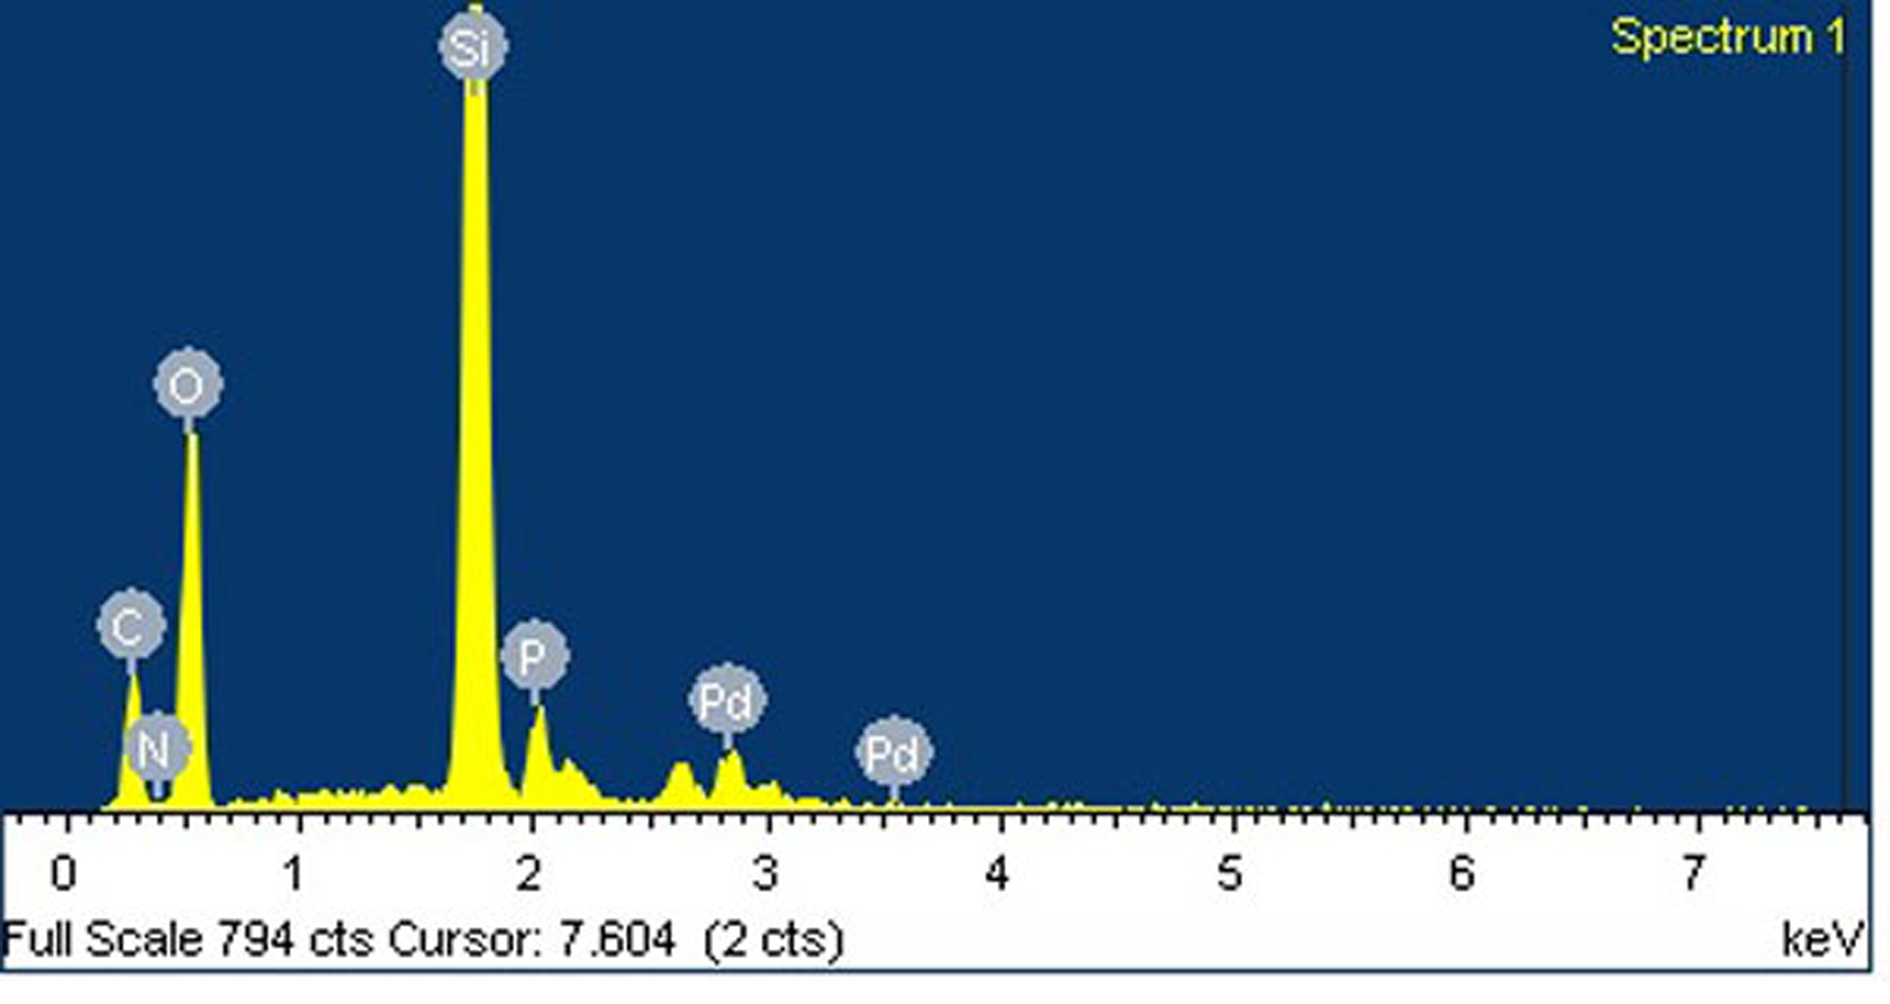


**SFig. 3.** EDS spectrum of MCM-41-2P-Pd(OAc)2.


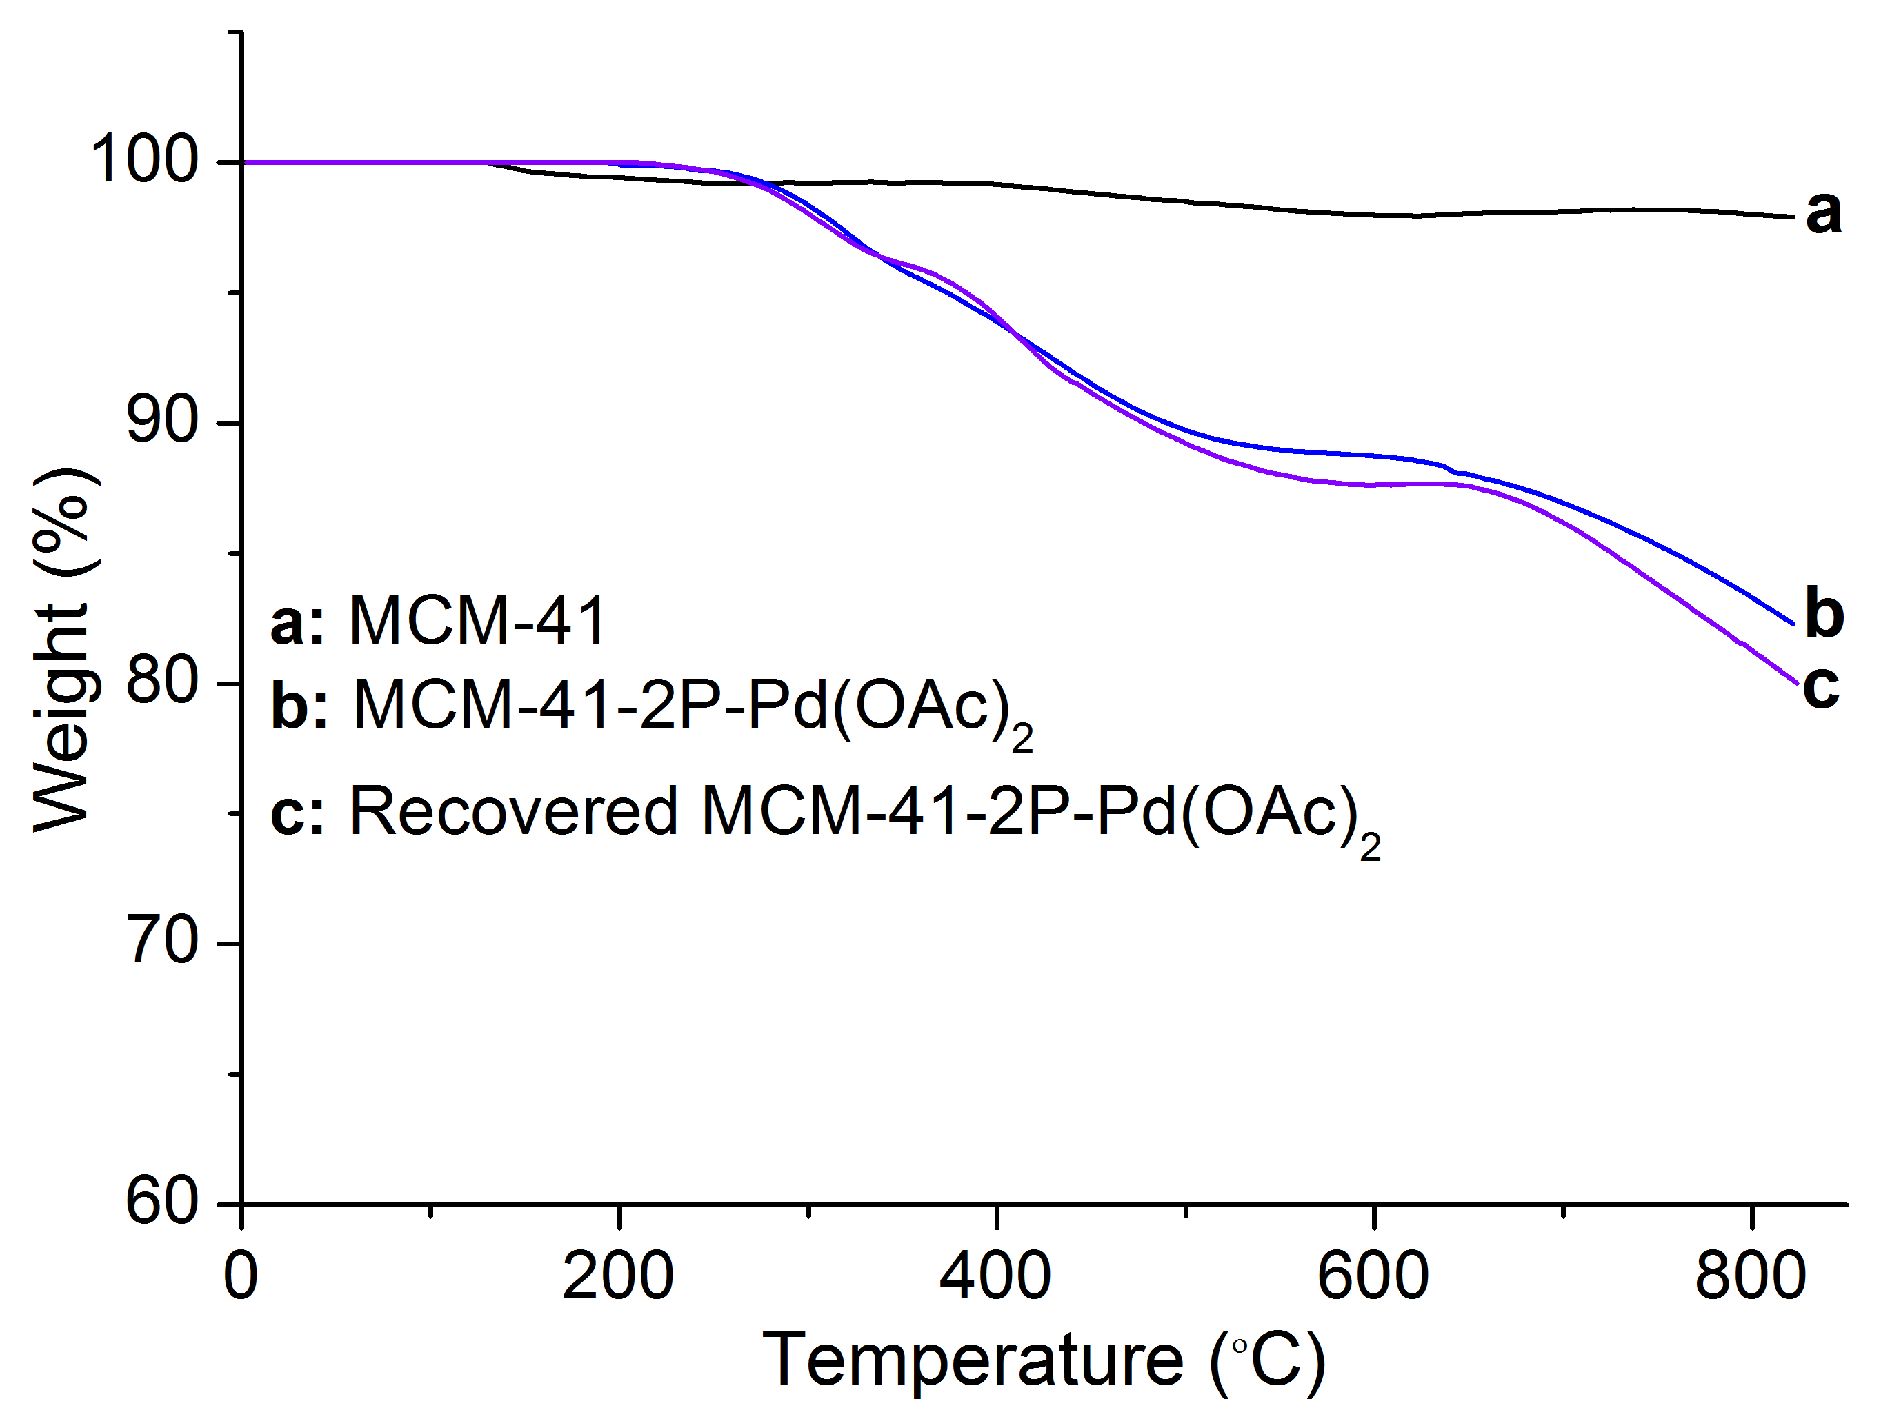


**SFig. 4.** TGA curves of MCM-41 (a), MCM-41-2P-Pd(OAc)2 (b) and the recovered MCM-41-2P-Pd(OAc)2 (c).


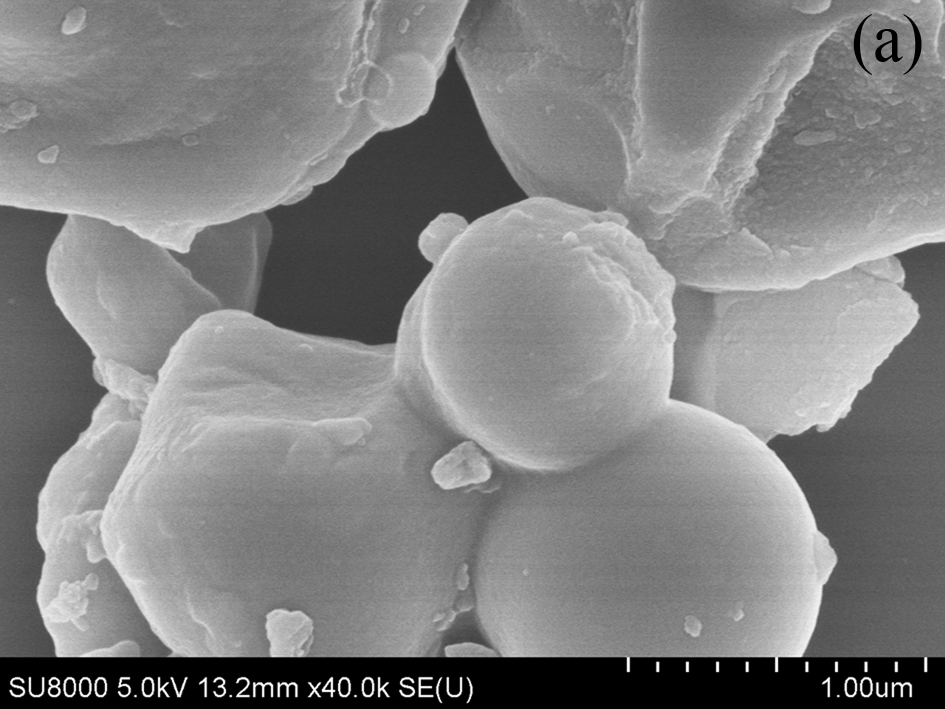

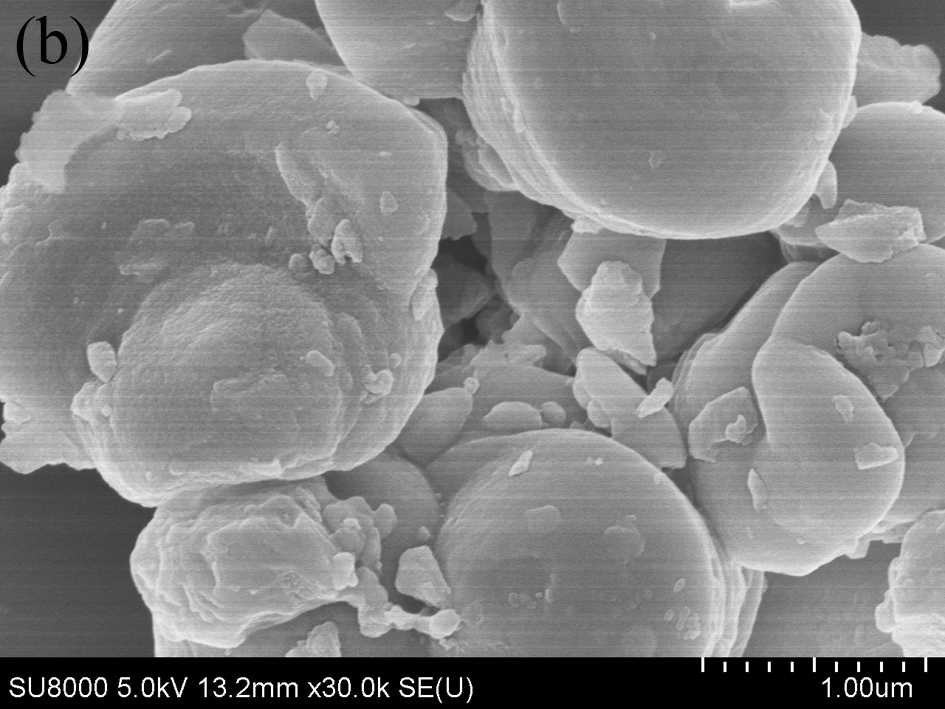


**SFig. 5.** SEM images of MCM-41 (a) and MCM-41-2P-Pd(OAc)2 (b)


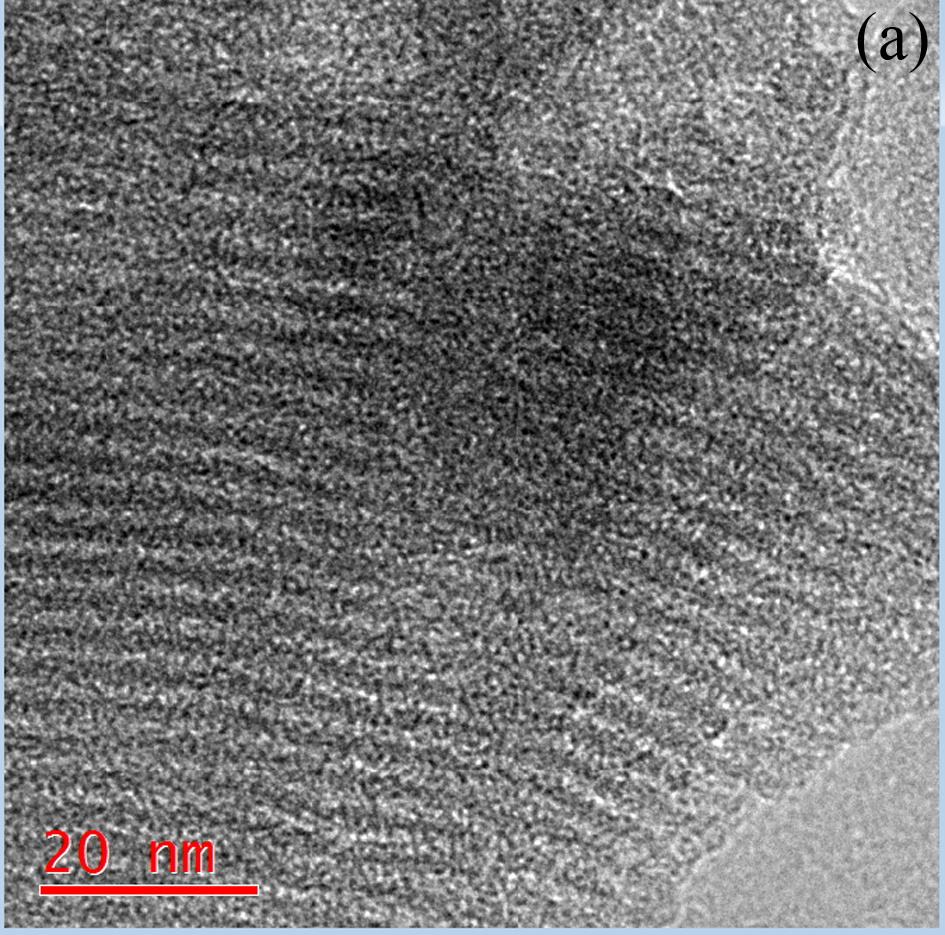

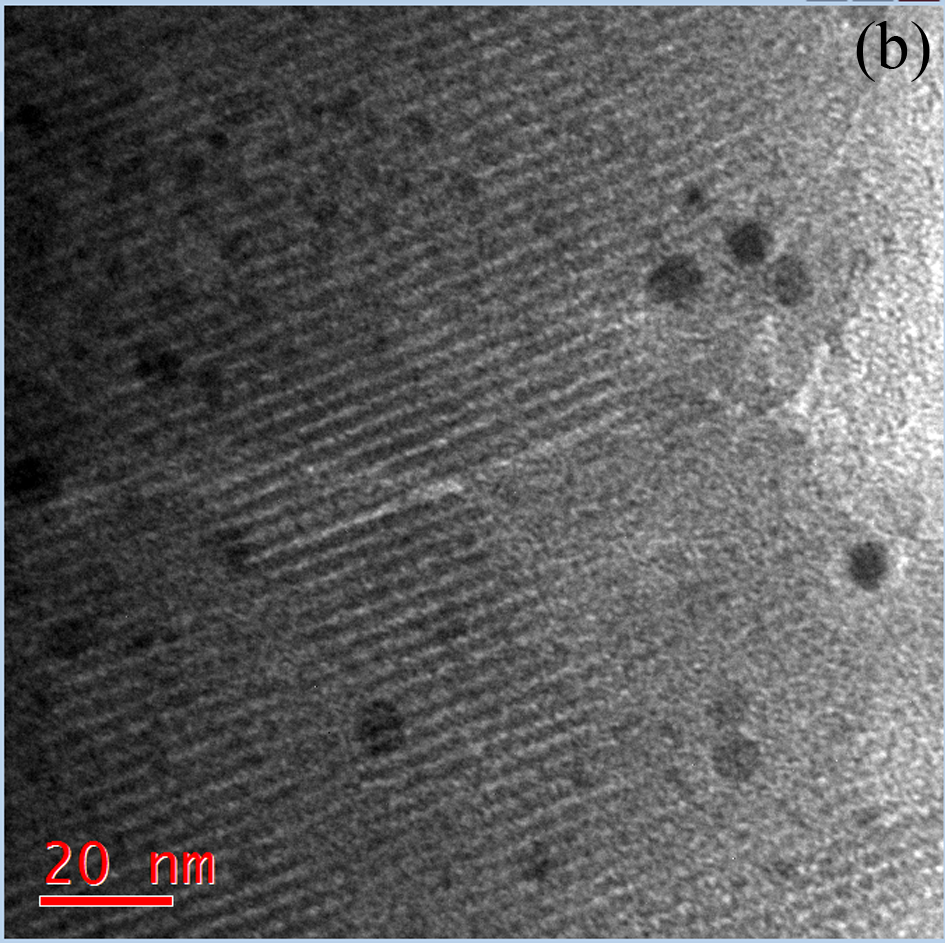


**SFig. 6.** TEM images of the fresh MCM-41-2P-Pd(OAc)2 (a) and the recovered MCM-41-2P-Pd(OAc)2 (b).


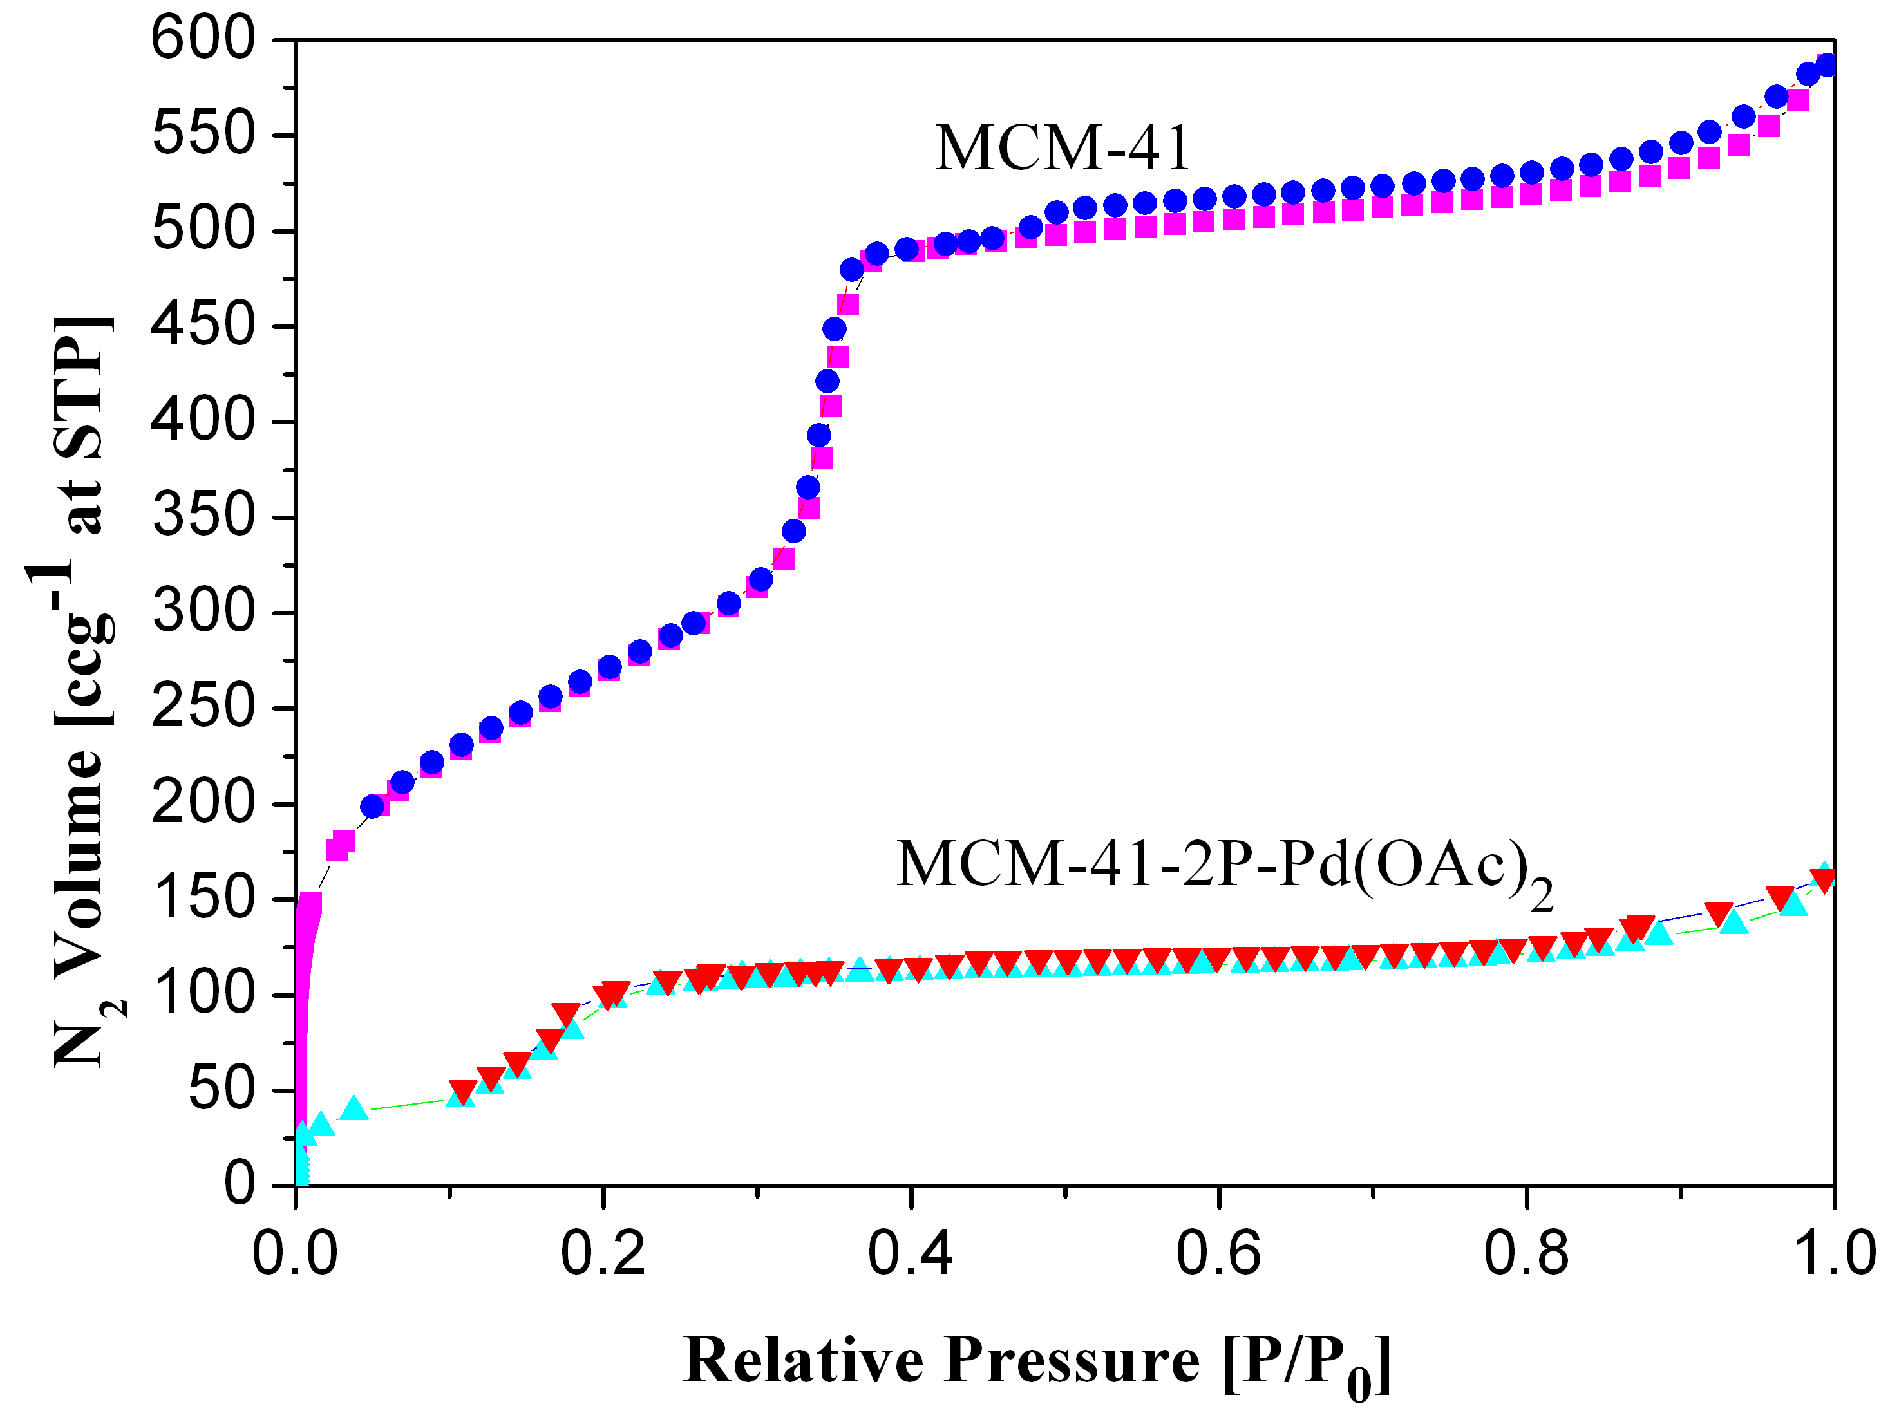


**SFig. 7.** N2 adsorption/desorption isotherms of MCM-41 and MCM-41-2P-Pd(OAc)2.


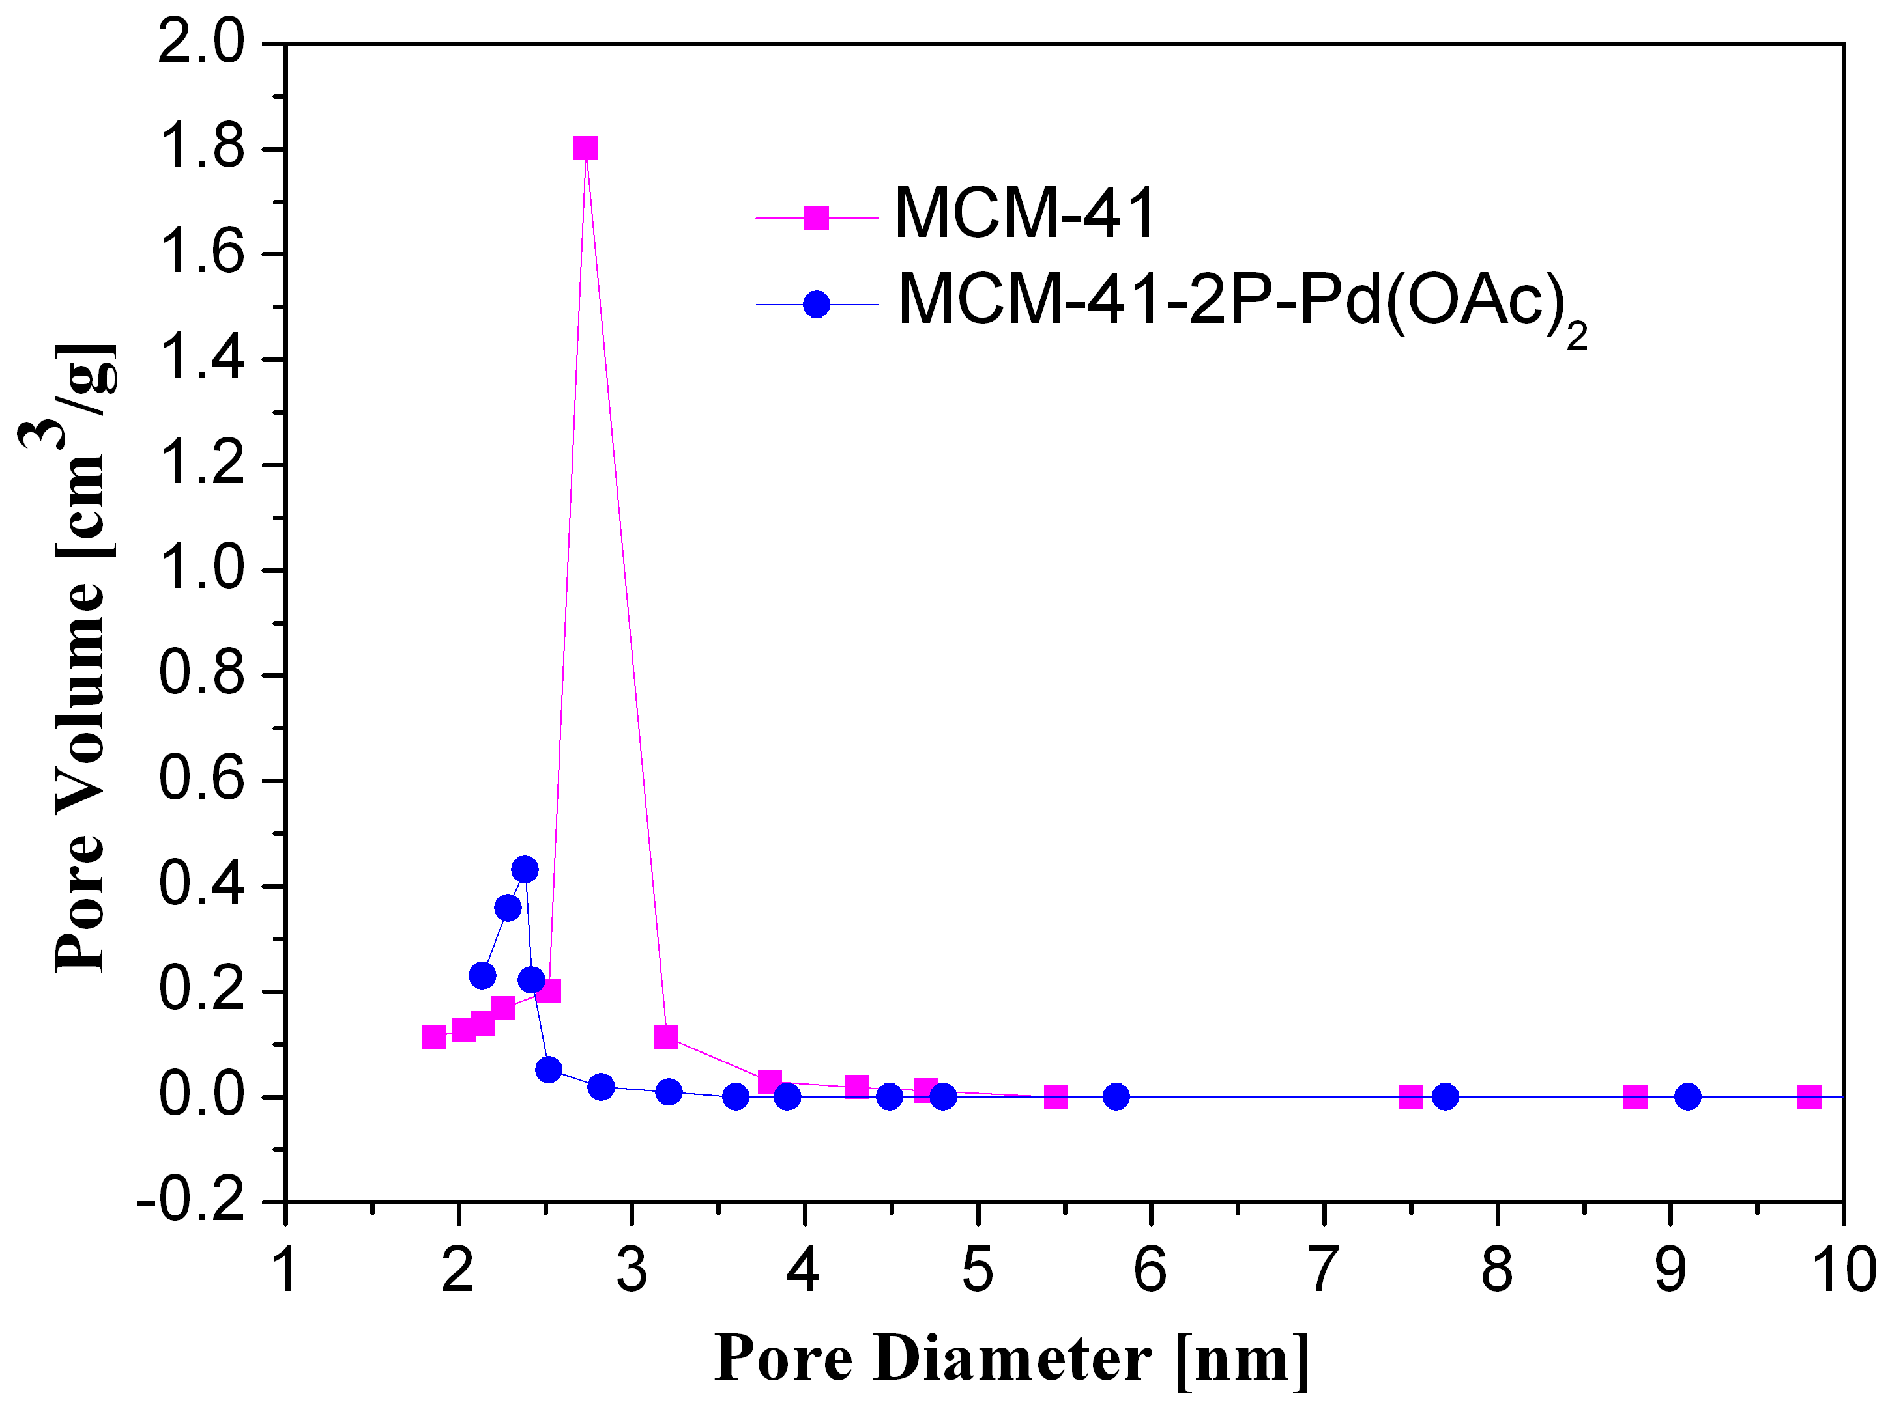


**SFig. 8.** Pore size distributions of MCM-41 and MCM-41-2P-Pd(OAc)2.


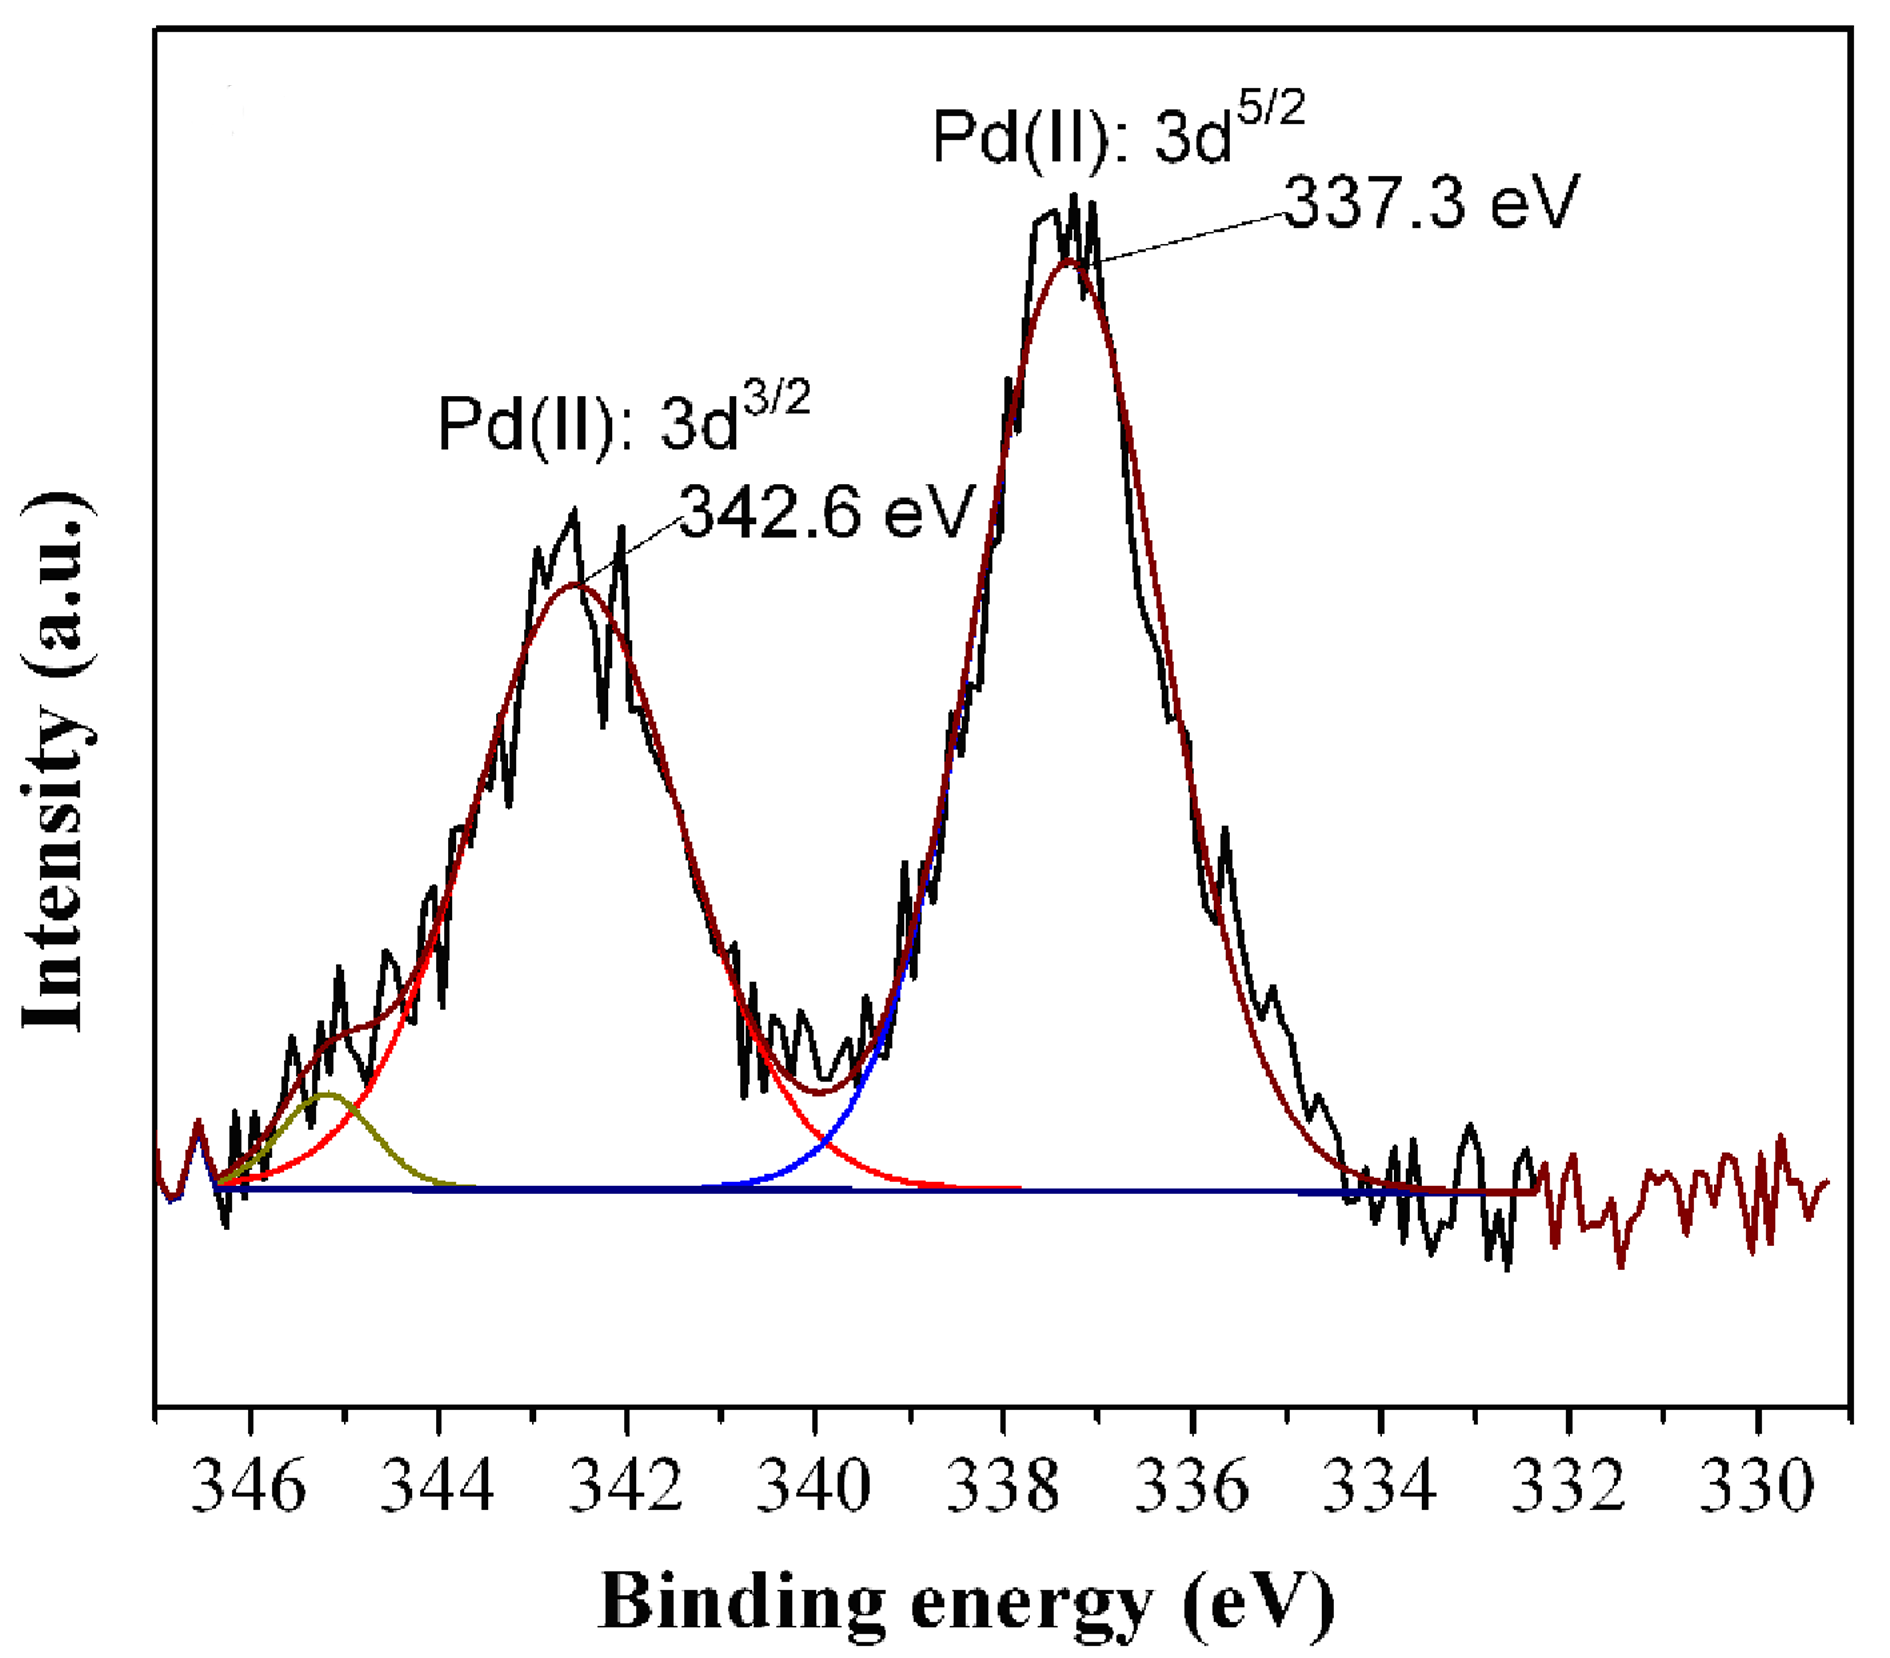


**SFig. 9.** XPS of the MCM-41-2P-Pd(OAc)2 complex

**General procedure for the heterogeneous palladium-catalyzed carbonylative synthesis of alkynyl ketones**

MCM-41-2P-Pd(OAc)2 (3 mol%) was transferred into an oven-dried reaction tube under Ar. Then aryl iodide (1.0 mmol), alkyne (2.0 mmol), formic acid (2.0 mmol), and toluene (4 mL) were added to the reaction tube. After DCC (2.0 mmol) and Et3N (2.0 mmol) were added, the tube was sealed, and the reaction mixture was stirred at 30 ºC for 24 h. After completion of the reaction, the reaction mixture was diluted with ethyl acetate (10 mL) and filtered. The catalyst was washed with DMF (2 × 5 mL), distilled water (2 × 5 mL), ethanol (2 × 5 mL), and dried at 80 ºC in vacuo for 1 h and reused in the next run. The filtrate was concentrated under vacuum and the residue was purified by chromatography on silica gel (eluent: light petroleum ether/ethyl acetate = 19:1) to afford the alkynyl ketone product **3**.

1,3-Diphenylprop-2-yn-1-one (**3a**).[1] Yellow oil. Yield: 95%. 1H NMR (400 MHz, CDCl3): δ 8.23 (d, *J* = 7.2 Hz, 2H), 7.70-7.67 (m, 2H), 7.63 (t, *J* = 7.4 Hz, 1H), 7.55-7.40 (m, 5H). 13C NMR (100 MHz, CDCl3): δ 178.0, 136.9, 134.2, 133.1, 130.8, 129.6, 128.7, 128.6, 120.2, 93.1, 86.9.

3-Phenyl-1-(*p*-tolyl)prop-2-yn-1-one (**3b**).[1] Yellow solid. Yield: 90%. Mp 69-70 ºC. 1H NMR (400 MHz, CDCl3): δ 8.12 (d, *J* = 8.0 Hz, 2H), 7.70-7.66 (m, 2H), 7.49-7.41 (m, 3H), 7.31 (d, *J* = 8.0 Hz, 2H), 2.45 (s, 3H). 13C NMR (100 MHz, CDCl3): δ 177.8, 145.3, 134.7, 133.1, 130.7, 129.7, 129.4, 128.7, 120.3, 92.6, 87.0, 21.9.

1-(4-Methoxyphenyl)-3-phenylprop-2-yn-1-one (**3c**).[1] Yellow oil. Yield: 85%. 1H NMR (400 MHz, CDCl3): δ 8.20 (dd, *J* = 6.8, 2.0 Hz, 2H), 7.70-7.65 (m, 2H), 7.51-7.47 (m, 1H), 7.46-7.39 (m, 2H), 6.99 (dd, *J* = 6.8, 2.0 Hz, 2H), 3.90 (s, 3H). 13C NMR (100 MHz, CDCl3): δ 176.7, 164.5, 133.0, 132.0, 130.6, 130.4, 128.7, 120.4, 113.9, 92.3, 87.0, 55.6.

1-(4-Chlorophenyl)-3-phenylprop-2-yn-1-one (**3d**).[1] Yellow oil. Yield: 88%. 1HNMR (400 MHz, CDCl3): δ 8.16 (d, *J* = 8.4 Hz, 2H), 7.69 (d, *J* = 7.6 Hz, 2H), 7.53-7.40 (m, 5H). 13C NMR (100 MHz, CDCl3): δ 176.7, 140.7, 135.3, 133.1, 131.0, 130.9, 129.0, 128.8, 119.9, 93.7, 86.6.

1-(3-Chlorophenyl)-3-phenylprop-2-yn-1-one (**3e**).[1] Yellow oil. Yield: 79%. 1H NMR (400 MHz, CDCl3): δ 8.18 (s, 1H), 8.11 (d, *J* = 7.6 Hz, 1H), 7.70 (d, *J* = 7.2 Hz, 2H), 7.60 (dd, *J* = 8.0, 1.2 Hz, 1H), 7.52-7.42 (m, 4H). 13C NMR (100 MHz, CDCl3): δ 176.6, 138.4, 135.0, 134.0, 133.2, 131.1, 130.0, 129.4, 128.8, 127.7, 119.8, 94.0, 86.5.

4-(3-Phenylpropioloyl)benzonitrile (**3f**).[1] Yellow solid. Yield: 55%. Mp 103-105 ºC. 1H NMR (400 MHz, CDCl3): δ 8.33 (d, *J* = 8.0 Hz, 2H), 7.80 (d, *J* = 8.4 Hz, 2H), 7.71 (d, *J* = 7.2 Hz, 2H), 7.53 (t, *J* = 7.6 Hz, 1H), 7.45 (t, *J* = 7.6 Hz, 2H). 13C NMR (100 MHz, CDCl3): δ 176.7, 133.2, 132.5, 131.2, 129.8, 128.8, 128.4, 125.8, 125.7, 119.7, 94.5, 86.6.

3-Phenyl-1-(4-(trifluoromethyl)phenyl)prop-2-yn-1-one (**3g**).[1] White solid. Yield: 64%. Mp 76-78 ºC. 1H NMR (400 MHz, CDCl3): δ 8.33 (d, *J* = 8.0 Hz, 2H), 7.79 (d, *J* = 8.4 Hz, 2H), 7.72-7.68 (m, 2H), 7.53-7.50 (m, 1H), 7.45 (t, *J* = 7.4 Hz, 2H). 13C NMR (100 MHz, CDCl3): δ 176.7, 139.4, 135.2 (q, *J* = 32.6 Hz), 133.2, 131.2, 129.8, 128.8, 125.7 (q, *J* = 3.7 Hz), 123.6 (q, *J* = 271.4 Hz), 119.7, 94.5, 86.6.

Methyl 4-(3-phenylpropioloyl)benzoate (**3h**).[1] White solid. Yield: 73%. Mp 103-105 ºC. 1H NMR (400 MHz, CDCl3): δ 8.27 (d, *J* = 8.4 Hz, 2H), 8.18 (d, *J* = 8.4 Hz, 2H), 7.72-7.68 (m, 2H), 7.54-7.49 (m, 1H), 7.44 (t, *J* = 7.4 Hz, 2H), 3.97 (s, 3H).13C NMR (100 MHz, CDCl3): δ 177.2, 166.1, 139.9, 134.7, 133.2, 131.1, 129.8, 129.4, 128.8, 119.8, 94.2, 86.8, 52.5.

1-([1,1'-Biphenyl]-4-yl)-3-phenylprop-2-yn-1-one (**3i**).[1] Yellow oil. Yield: 78%. 1H NMR (400 MHz, CDCl3): δ 8.29 (d, *J* = 8.4 Hz, 2H), 7.75-7.68 (m, 4H), 7.67-7.63 (m, 2H), 7.52-7.38 (m, 6H). 13C NMR (100 MHz, CDCl3): δ 177.6, 146.9, 139.8, 135.8, 133.1, 130.8, 130.2, 129.0, 128.7, 128.5, 127.4, 127.3, 120.2, 93.1, 87.1.

1-(Naphthalen-1-yl)-3-phenylprop-2-yn-1-one (**3j**).[1] Yellow solid. Yield: 89%. Mp 94-95 ºC. 1H NMR (400 MHz, CDCl3): δ 9.24 (d, *J* = 8.8 Hz, 1H), 8.64 (dd, *J* = 7.2, 1.2 Hz, 1H), 8.09 (d, *J* = 8.0 Hz, 1H), 7.91 (d, *J* = 8.0 Hz, 1H), 7.71-7.65 (m, 3H), 7.63-7.54 (m, 2H), 7.50-7.38 (m, 3H). 13C NMR (100 MHz, CDCl3): δ 179.8, 135.1, 134.5, 133.9, 133.0, 132.9, 130.8, 130.6, 129.0, 128.7, 128.6, 126.8, 126.0, 124.5, 120.4, 91.7, 88.5.

Methyl 2-(3-phenylpropioloyl)benzoate (**3k**). Yellow oil. Yield: 60%. 1H NMR (400 MHz, CDCl3): δ 8.01-7.97 (m, 1H), 7.73-7.68 (m, 1H), 7.66-7.59 (m, 4H), 7.48 (t, *J* = 7.2 Hz, 1H), 7.41 (t, *J* = 7.6 Hz, 2H), 3.90 (s, 3H). 13C NMR (100 MHz, CDCl3): δ 178.5, 168.8, 138.0, 133.2, 132.6, 132.3, 131.0, 130.9, 129.9, 129.0, 128.7, 119.8, 93.8, 87.6, 52.8. HRMS calcd for C17H12O3+ [M]+: 264.0786, found 264.0784.

3-Phenyl-1-(thiophen-2-yl)prop-2-yn-1-one (**3l**).[2] Yellow solid. Yield: 86%. Mp 54-55 °C. 1H NMR (400 MHz, CDCl3): δ 8.00 (dd, *J* = 3.8, 1.0 Hz, 1H), 7.72 (dd, *J* = 4.8, 0.8 Hz, 1H), 7.67-7.63 (m, 2H), 7.51-7.47 (m, 1H), 7.45-7.38 (m, 2H), 7.18 (dd, *J* = 4.8, 4.0 Hz, 1H). 13C NMR (100 MHz, CDCl3): δ 169.7, 144.9, 135.3, 135.1, 133.0, 130.9, 128.7, 128.4, 119.9, 91.7, 86.5.

3-Phenyl-1-(quinolin-6-yl)prop-2-yn-1-one (**3m**).[1] Yellow oil. Yield: 81%. 1H NMR (400 MHz, CDCl3): δ 9.04 (d, *J* = 2.8 Hz, 1H), 8.76 (d, *J* = 1.2 Hz, 1H), 8.47 (dd, *J* = 8.8, 2.0 Hz, 1H), 8.35 (d, *J* = 8.4 Hz, 1H), 8.21 (d, *J* = 8.8 Hz, 1H), 7.74 (d, *J* = 7.2 Hz, 2H), 7.55-7.43 (m, 4H). 13C NMR (100 MHz, CDCl3): δ 177.2, 153.1, 150.6, 137.8, 134.8, 133.1, 132.0, 131.0, 130.2, 128.8, 128.0, 127.5, 122.2, 120.0, 93.8, 86.9.

1-Phenyl-3-(*p*-tolyl)prop-2-yn-1-one (**3n**).[1] Yellow oil. Yield: 90%. 1H NMR (400 MHz, CDCl3): δ 8.23 (d, *J* = 7.6 Hz, 2H), 7.63 (t, *J* = 7.4 Hz, 1H), 7.59 (d, *J* = 8.0 Hz, 2H), 7.52 (t, *J* = 7.6 Hz, 2H), 7.23 (d, *J* = 7.6 Hz, 2H), 2.41 (s, 3H). 13C NMR (100 MHz, CDCl3): δ 178.1, 141.6, 137.0, 134.0, 133.2, 129.6, 129.5, 128.6, 117.1, 93.8, 86.8, 21.8.

1-Phenyl-3-(*m*-tolyl)prop-2-yn-1-one (**3o**).[1] Yellow oil. Yield: 96%. 1H NMR (400 MHz, CDCl3): δ 8.23 (d, *J* = 7.6 Hz, 2H), 7.63 (t, *J* = 7.6 Hz, 1H), 7.56-7.48 (m, 4H), 7.33-7.28 (m, 2H), 2.39 (s, 3H). 13C NMR (100 MHz, CDCl3): δ 178.1, 138.6, 137.0, 134.1, 133.6, 131.8, 130.3, 129.6, 128.6, 120.0, 93.5, 86.7, 21.2.

3-(4-(*tert*-Butyl)phenyl)-1-phenylprop-2-yn-1-one (**3p**).[1] Yellow oil. Yield: 95%. 1H NMR (400 MHz, CDCl3): δ 8.16 (d, *J* = 7.6 Hz, 2H), 7.59-7.53 (m, 3H), 7.45 (t, *J* = 7.6 Hz, 2H), 7.38 (d, *J* = 8.4 Hz, 2H), 1.27 (s, 9H). 13C NMR (100 MHz, CDCl3): δ 178.1, 154.6, 137.1, 134.0, 133.0, 129.6, 128.6, 125.8, 117.1, 93.8, 86.8, 35.1, 31.1.

3-(4-Methoxyphenyl)-1-phenylprop-2-yn-1-one (**3q**).[1] Yellow oil. Yield: 88%. 1H NMR (400 MHz, CDCl3): δ 8.22 (d, *J* = 7.6 Hz, 2H), 7.67-7.60 (m, 3H), 7.52 (t, *J* = 7.6 Hz, 2H), 6.94 (d, *J* = 8.4 Hz, 2H), 3.86 (s, 3H). 13C NMR (100 MHz, CDCl3): δ 178.1, 161.8, 137.1, 135.2, 133.9, 129.5, 128.6, 114.5, 111.9, 94.3, 86.9, 55.5.

3-(4-Fluorophenyl)-1-phenylprop-2-yn-1-one (**3r**).[1] Yellow oil.Yield: 89%. 1H NMR (400 MHz, CDCl3): δ 8.22 (d, *J* = 7.6 Hz, 2H), 7.73-7.67 (m, 2H), 7.65 (t, *J* = 7.4 Hz, 1H), 7.53 (t, *J* = 7.6 Hz, 2H), 7.13 (t, *J* = 8.6 Hz, 2H). 13C NMR (100 MHz, CDCl3): δ 177.9, 164.1 (d, *J* = 252.2 Hz), 136.8, 135.4 (d, *J* = 8.8 Hz), 134.2, 129.6, 128.7, 116.3 (d, *J* = 22.2 Hz), 116.3 (d, *J* = 3.4 Hz), 92.0, 86.8.

3-(4-Chlorophenyl)-1-phenylprop-2-yn-1-one (**3s**).[1] Yellow oil. Yield: 81%. 1H NMR (400 MHz, CDCl3): δ 8.21 (d, *J* = 7.6 Hz, 2H), 7.67-7.59 (m, 3H), 7.53 (t, *J* = 7.6 Hz, 2H), 7.41 (d, *J* = 8.4 Hz, 2H). 13C NMR (100 MHz, CDCl3): δ 177.8, 137.2, 136.8, 134.3, 133.7, 129.6, 129.2, 128.7, 118.6, 91.6, 87.6.

3-(4-Bromophenyl)-1-phenylprop-2-yn-1-one (**3t**).[1] Yellow oil. Yield: 80%. 1H NMR (400 MHz, CDCl3): δ 8.20 (d, *J* = 7.2 Hz, 2H), 7.64 (t, *J* = 7.2 Hz, 1H), 7.60-7.50 (m, 6H). 13C NMR (100 MHz, CDCl3): δ 177.8, 136.8, 134.4, 134.3, 132.1, 129.6, 128.7, 125.6, 119.1, 91.6, 87.7.

1-Phenyl-3-(pyridin-3-yl)prop-2-yn-1-on**e** (**3u**).[3] Yellow solid. Yield: 59%. Mp 66-68 ºC.1H NMR (400 MHz, CDCl3): δ 8.91 (s, 1H), 8.70 (d, *J* = 4.8 Hz, 1H), 8.22 (d, *J* = 8.4 Hz, 2H), 7.98 (d, *J* = 8.0 Hz, 1H), 7.66 (t, *J* = 7.6 Hz, 1H), 7.54 (t, *J* = 7.6 Hz, 2H), 7.39 (dd, *J* = 7.8, 5.0 Hz, 1H). 13C NMR (100 MHz, CDCl3): δ 177.6, 153.3, 150.8, 139.9, 136.5, 134.5, 129.6, 128.8, 123.3, 117.6, 89.4, 89.0.

1-Phenyl-3-(thiophen-3-yl)prop-2-yn-1-one (**3v**).[1] Yellow oil.Yield: 45%. 1H NMR (400 MHz, CDCl3): δ 8.21 (d, *J* = 7.6 Hz, 2H), 7.86 (d, *J* = 2.4 Hz, 1H), 7.63 (t, *J* = 6.8 Hz, 1H), 7.52 (t, *J* = 7.4 Hz, 2H), 7.39-7.32 (m, 2H). 13C NMR (100 MHz, CDCl3): δ 178.0, 136.9, 134.1, 133.9, 130.3, 129.6, 128.6, 126.3, 119.4, 88.5, 87.2.

3-(Cyclohex-1-en-1-yl)-1-phenylprop-2-yn-1-one (**3w**).[1] Yellow oil. Yield: 82%. 1H NMR (400 MHz, CDCl3): δ 8.14 (d, *J* = 8.0 Hz, 2H), 7.60 (t, *J* = 7.2 Hz, 1H), 7.48 (t, *J* = 7.4 Hz, 2H), 6.58 (br, 1H), 2.30-2.27 (m, 2H), 2.24-2.19 (m, 2H), 1.75-1.62 (m, 4H). 13C NMR (100 MHz, CDCl3): δ 178.3, 142.7, 137.1, 133.8, 129.5, 128.5, 119.2, 95.8, 85.2, 28.4, 26.2, 22.0, 21.1.

3-Cyclohexyl-1-phenylprop-2-yn-1-one (**3x**).[1] Yellow oil. Yield: 85%. 1H NMR (400 MHz, CDCl3): δ 8.14 (d, *J* = 8.0 Hz, 2H), 7.59 (t, *J* = 7.2 Hz, 1H), 7.48 (t, *J* = 7.4 Hz, 2H), 2.72-2.68 (m, 1H), 1.94-1.90 (m, 2H), 1.79-1.75 (m, 2H), 1.67-1.54 (m, 3H), 1.42-1.32 (m, 3H). 13C NMR (100 MHz, CDCl3): δ 178.4, 137.1, 133.8, 129.5, 128.5, 100.4, 79.6, 31.7, 29.4, 25.7, 24.7.

3-Cyclopropyl-1-phenylprop-2-yn-1-on**e** (**3y**). Yellow oil. Yield: 79%. 1H NMR (400 MHz, CDCl3): δ 8.11 (d, *J* = 7.2 Hz, 2H), 7.59 (t, *J* = 7.4 Hz, 1H), 7.47 (t, *J* = 7.6 Hz, 2H), 1.56-1.51 (m, 1H), 1.07-1.01 (m, 4H). 13C NMR (101 MHz, CDCl3): δ 178.0, 137.0, 133.8, 129.4, 128.4, 101.1, 75.5, 9.9, 0.0. HRMS calcd for C12H10O+ [M]+: 170.0732, found 170.0737.

1-Phenylnon-2-yn-1-one (**3z**).[4] Yellow oil. Yield: 20%. 1H NMR (400 MHz, CDCl3): δ 8.15-8.13 (m, 2H), 7.62-7.57 (m, 1H), 7.48 (t, *J* = 7.6 Hz, 2H), 2.50 (t, *J* = 7.0 Hz, 2H), 1.72-1.64 (m, 2H), 1.53-1.44 (m, 2H), 1.36-1.31 (m, 4H), 0.91 (t, *J* = 6.8 Hz, 3H). 13C NMR (100 MHz, CDCl3): δ 178.3, 137.0, 133.9, 129.6, 128.5, 96.9, 79.7, 31.3, 28.7, 27.8, 22.5, 19.3, 14.0.

**References**

[1] Peng, J.-B.; Wu, F.-P.; Li, C.-L.; Qi, X.; Wu, X.-F. *Eur. J. Org. Chem.* **2017**, 1434-1437.

[2] Bakherad, M.; Amin, A. H.; Keivanloo, A.; Bahramian, B.; Raessi, M. *Chin. Chem. Lett.* **2010**, *21*, 656-660.

[3] Rao, P. N. P.; Uddin, M. J.; Knaus, E. E. *J. Med. Chem.* **2004**, *47*, 3972-3990.

[4] Chen, L.; Li, C.-J. *Org. Lett.* **2004**, *6*, 3151-3153.

Copies of 1H NMR and 13C NMR spectra of compounds **3a-3z**.

1H NMR and 13C NMR spectra of compound **3a**

1H NMR and 13C NMR spectra of compound **3b**

1H NMR and 13C NMR spectra of compound **3c**

1H NMR and 13C NMR spectra of compound **3d**

1H NMR and 13C NMR spectra of compound **3e**

1H NMR and 13C NMR spectra of compound **3f**

1H NMR and 13C NMR spectra of compound **3g**

1H NMR and 13C NMR spectra of compound **3h**

1H NMR and 13C NMR spectra of compound **3i**

1H NMR and 13C NMR spectra of compound **3j**

1H NMR and 13C NMR spectra of compound **3k**

1H NMR and 13C NMR spectra of compound **3l**

1H NMR and 13C NMR spectra of compound **3m**

1H NMR and 13C NMR spectra of compound **3n**

1H NMR and 13C NMR spectra of compound **3o**

1H NMR and 13C NMR spectra of compound **3p**

1H NMR and 13C NMR spectra of compound **3q**

1H NMR and 13C NMR spectra of compound **3r**

1H NMR and 13C NMR spectra of compound **3s**

1H NMR and 13C NMR spectra of compound **3t**

1H NMR and 13C NMR spectra of compound **3u**

1H NMR and 13C NMR spectra of compound **3v**

1H NMR and 13C NMR spectra of compound **3w**

1H NMR and 13C NMR spectra of compound **3x**

1H NMR and 13C NMR spectra of compound **3y**

1H NMR and 13C NMR spectra of compound **3z**
